# Supplementary material for: Determination of polychlorinated biphenyls and organochlorine pesticides in Chinese mitten crabs (Eriocheir sinensis) using modified QuEChERS followed by GC-MS
Source: Royal Society of Chemistry journal article supplement (doi:10.1039/d0ay00519c), 2020-01-01
Supplement: d0ay00519c1.pdf [file d0ay00519c1.pdf]

Supporting Information

for

**Determination of Polychlorinated Biphenyls and  
Organochlorine Pesticides in Chinese mitten Crab  
(*Eriocheir sinensis*) using modified QuEChERS  
followed by GC–MS**

Ting Liu, Jianguang Zhou, Li He, Jinhua Gan\*

*Yangtze River Fisheries Research Institute, Chinese Academy of Fishery Sciences, Wuhan, China*

\* Corresponding author: Jinhua Gan. Tel: +86-10-81780165; E-mail: [gjh@yfi.ac.cn](mailto:gjh@yfi.ac.cn)

The Supporting Information includes following items:

---

|         |                                                                                                                                                                                         |
|---------|-----------------------------------------------------------------------------------------------------------------------------------------------------------------------------------------|
| Page S3 | <b>Table S1.</b> The information of collected Chinese mitten crabs.                                                                                                                     |
| Page S4 | <b>Table S2.</b> Target compounds, retention time and selected SIM ions for the analysis of pollutants residues by mass spectrometry.                                                   |
| Page S5 | <b>Table S3.</b> Average recovery and relative standard deviation (RSD) of 8 PCBs and 10 OCPs spiked in white meat of mitten crabs at three different concentrations by GC–MS analysis. |
| Page S6 | <b>Table S4.</b> Average recovery and relative standard deviation (RSD) of 8 PCBs and 10 OCPs spiked in brown meat of mitten crabs at three different concentrations by GC–MS analysis. |
| Page S7 | <b>Table S5.</b> Comparison of the analytical features of the method proposed with other previously reported studies.                                                                   |

---

Table S1. The information of collected Chinese mitten crabs.

| Number | Average weight | Location                |
|--------|----------------|-------------------------|
| 01     | 2.8 kg         | 29°59'41"N, 116°40'3"E  |
| 02     | 2.5 kg         | 29°59'19"N, 116°39'47"E |
| 03     | 2.4 kg         | 29°16'35"N, 116°12'38"E |
| 04     | 2.6 kg         | 29°43'35"N, 116°18'26"E |
| 05     | 2.7 kg         | 29°35'13"N, 116°20'40"E |
| 06     | 2.9 kg         | 29°42'59"N, 115°48'2"E  |
| 07     | 2.9 kg         | 29°46'49"N, 115°39'28"E |
| 08     | 2.4 kg         | 29°2'22"N, 115°49'13"E  |
| 09     | 2.8 kg         | 29°3'13"N, 115°51'31"E  |
| 10     | 3.0 kg         | 29°15'1"N, 115°49'27"E  |
| 11     | 2.5 kg         | 29°59'26"N, 116°43'7"E  |
| 12     | 2.7 kg         | 29°59'7"N, 116°44'1"E   |

Table S2. Target compounds, retention time and selected SIM ions for the analysis of pollutants residues by mass spectrometry.

| Compounds        | Retention Time (min) | SIM ions    |
|------------------|----------------------|-------------|
| $\alpha$ -HCH    | 8.78                 | 218.9/180.9 |
| $\beta$ -HCH     | 9.46                 | 218.9/182.9 |
| $\gamma$ -HCH    | 9.57                 | 218.9/180.9 |
| $\delta$ -HCH    | 10.28                | 218.9/180.9 |
| <i>p,p'</i> -DDT | 18.40                | 234.9       |
| <i>o,p'</i> -DDT | 17.23                | 236.9       |
| <i>p,p'</i> -DDD | 17.15                | 234.9       |
| <i>o,p'</i> -DDD | 16.01                | 236.9       |
| <i>p,p'</i> -DDE | 15.73                | 245.9       |
| <i>o,p'</i> -DDE | 14.70                | 317.8       |
| PCB 28           | 11.09                | 255.9/185.9 |
| PCB 52           | 12.08                | 291.8/219.9 |
| PCB 101          | 14.80                | 325.8       |
| PCB 118          | 16.86                | 325.7/183.9 |
| PCB 153          | 17.61                | 359.7/289.8 |
| PCB 138          | 18.55                | 359.7/289.8 |
| PCB 180          | 20.60                | 393.7/323.7 |
| PCB 198          | 21.33                | 429.6/357.7 |

Table S3. Average recovery and relative standard deviation (RSD) of 8 PCBs and 10 OCPs spiked in white meat of mitten crabs at three different concentrations by GC–MS analysis (n = 6).

| Compounds        | 10 µg kg <sup>-1</sup> spike level |         | 20 µg kg <sup>-1</sup> spike level |         | 50 µg kg <sup>-1</sup> spike level |         |
|------------------|------------------------------------|---------|------------------------------------|---------|------------------------------------|---------|
|                  | Recovery (%)                       | RSD (%) | Recovery (%)                       | RSD (%) | Recovery (%)                       | RSD (%) |
| α-HCH            | 108.9                              | 14.3    | 107.6                              | 12.4    | 114.7                              | 12.2    |
| β-HCH            | 112.2                              | 1.9     | 119.9                              | 4.3     | 104.3                              | 4.6     |
| γ-HCH            | 103.7                              | 10.3    | 104.1                              | 14.4    | 108.1                              | 10.4    |
| δ-HCH            | 105.8                              | 4.6     | 100.8                              | 2.7     | 107.5                              | 2.8     |
| <i>p,p'</i> -DDT | 110.1                              | 1.6     | 106.7                              | 1.9     | 109.2                              | 4.4     |
| <i>o,p'</i> -DDT | 115.3                              | 3.7     | 103.7                              | 1.3     | 110.8                              | 6.7     |
| <i>p,p'</i> -DDD | 111.4                              | 8.8     | 110.4                              | 11.9    | 114.9                              | 11.2    |
| <i>o,p'</i> -DDD | 93.5                               | 12.4    | 98.4                               | 11.6    | 96.2                               | 7.4     |
| <i>p,p'</i> -DDE | 80.2                               | 12.8    | 89.2                               | 10.4    | 95.3                               | 9.3     |
| <i>o,p'</i> -DDE | 107.4                              | 3.2     | 91.7                               | 9.2     | 101.4                              | 10.6    |
| PCB 28           | 100.9                              | 2.1     | 102.6                              | 0.2     | 99.2                               | 0.1     |
| PCB 52           | 102.8                              | 4.9     | 108.7                              | 5.4     | 100.6                              | 4.3     |
| PCB 101          | 111.6                              | 3.3     | 119.7                              | 0.6     | 113.4                              | 0.9     |
| PCB 118          | 107.7                              | 6.4     | 109.5                              | 2.6     | 101.5                              | 4.8     |
| PCB 153          | 105.9                              | 5.7     | 105.4                              | 7.7     | 102.6                              | 11.5    |
| PCB 138          | 107.6                              | 8.2     | 106.2                              | 6.3     | 105.3                              | 9.5     |
| PCB 180          | 99.8                               | 7.9     | 101.6                              | 2.0     | 100.2                              | 6.9     |
| PCB 198          | 116.3                              | 12.1    | 118.6                              | 11.3    | 114.5                              | 6.8     |

Table S4. Average recovery and relative standard deviation (RSD) of 8 PCBs and 10 OCPs spiked in brown meat of mitten crabs at three different concentrations by GC–MS analysis (n = 6).

| Compounds        | 10 µg kg <sup>-1</sup> spike level |         | 20 µg kg <sup>-1</sup> spike level |         | 50 µg kg <sup>-1</sup> spike level |         |
|------------------|------------------------------------|---------|------------------------------------|---------|------------------------------------|---------|
|                  | Recovery (%)                       | RSD (%) | Recovery (%)                       | RSD (%) | Recovery (%)                       | RSD (%) |
| $\alpha$ -HCH    | 110.2                              | 11.2    | 102.7                              | 8.9     | 105.1                              | 1.6     |
| $\beta$ -HCH     | 99.6                               | 4.2     | 108.2                              | 7.4     | 110.5                              | 3.4     |
| $\gamma$ -HCH    | 102.3                              | 6.6     | 97.3                               | 3.5     | 113.2                              | 2.9     |
| $\delta$ -HCH    | 96.7                               | 7.7     | 105.9                              | 9.1     | 100.3                              | 5.7     |
| <i>p,p'</i> -DDT | 100.3                              | 8.2     | 111.6                              | 2.9     | 104.8                              | 3.6     |
| <i>o,p'</i> -DDT | 104.2                              | 4.0     | 102.3                              | 2.6     | 100.9                              | 5.5     |
| <i>p,p'</i> -DDD | 110.4                              | 7.2     | 114.8                              | 3.9     | 101.1                              | 6.6     |
| <i>o,p'</i> -DDD | 99.2                               | 11.7    | 103.8                              | 8.7     | 92.9                               | 5.8     |
| <i>p,p'</i> -DDE | 89.3                               | 4.5     | 94.2                               | 6.8     | 87.3                               | 7.4     |
| <i>o,p'</i> -DDE | 102.9                              | 5.6     | 109.0                              | 3.7     | 99.3                               | 5.2     |
| PCB 28           | 108.1                              | 10.7    | 102.1                              | 9.5     | 109.2                              | 3.8     |
| PCB 52           | 117.3                              | 8.4     | 112.5                              | 8.9     | 110.5                              | 6.6     |
| PCB 101          | 101.8                              | 5.3     | 103.2                              | 7.7     | 89.3                               | 9.4     |
| PCB 118          | 114.6                              | 5.5     | 111.5                              | 8.6     | 119.2                              | 3.7     |
| PCB 153          | 93.6                               | 1.7     | 99.7                               | 3.2     | 106.8                              | 1.9     |
| PCB 138          | 98.9                               | 1.9     | 106.2                              | 1.2     | 101.6                              | 3.6     |
| PCB 180          | 99.3                               | 7.4     | 108.3                              | 5.8     | 92.1                               | 6.9     |
| PCB 198          | 102.8                              | 2.2     | 115.2                              | 6.8     | 104.3                              | 3.6     |

Table S5. Comparison of the analytical features of the method proposed with other previously reported studies.

| Analytes                          | Matrix               | Extraction time | Extraction solvent                      | Solvent consumption | LOD ( $\mu\text{g kg}^{-1}$ ) | LOQ ( $\mu\text{g kg}^{-1}$ ) | Ref.                               |
|-----------------------------------|----------------------|-----------------|-----------------------------------------|---------------------|-------------------------------|-------------------------------|------------------------------------|
| PCBs                              | Chinese mitten crabs | Not mentioned   | Hexane-acetone (1:1)                    | 20 mL               | 0.003-0.03                    | 0.01-0.1                      | Ron L.A.P. Hoogenboom <sup>1</sup> |
| pharmaceutical and other residues | Crabs                | 15 min          | MeCN                                    | 10 mL               | 3.3-15                        | 10-50                         | Cong Kong <sup>2</sup>             |
| DDTs and PCBs                     | Water                | 5 h             | n-Hexane                                | 40 mL               | 1                             | 3.3                           | A. Aguilar <sup>3</sup>            |
| OCPs                              | Shrimps              | >24 h           | Hexane-dichloromethane mixture (1:1v/v) | 80 mL               | 0.01                          | 0.03                          | Jing Chen <sup>4</sup>             |
| OCPs, PCBs and PBDEs              | Crabs                | 8 h             | n-hexane-dichloromethane (1:1)          | 100 mL              | 0.03-0.33                     | 0.1-1.1                       | Marta Commendatorea <sup>5</sup>   |
| OCPs, PCBs and PAHs               | Sediment             | 20 min          | hexane/acetone, dichloromethane/acetone | 20 mL               | 0.003-2.8                     | 0.01-9.6                      | Fida Ben Salem <sup>6</sup>        |
| PCBs and PAHs                     | Blue crabs           | 36 h            | acetone and n-hexane (1:1, V/V)         | 300 mL              | 0.02                          | 0.07                          | Mansoreh Ghaeni <sup>7</sup>       |
| PCBs                              | catfish              | 30 min.         | Water and acetonitrile                  | 35 mL               | 0.3                           | 1                             | Narong Chamkasem <sup>8</sup>      |
| PCBs and PCDD/Fs                  | Chinese mitten crabs | Not mentioned   | dichloromethane and hexane (1:1, v:v)   | 100 mL              | 0.08-0.8                      | 0.3-2.5                       | Ying Han <sup>9</sup>              |
| OCPs and PCBs                     | Chinese mitten crabs | 15 min          | MeCN                                    | 15 mL               | 0.03-1.08                     | 0.1-3.6                       | The proposed method                |

## References:

1. Hoogenboom, R. L.; Kotterman, M. J.; Hoek-van Nieuwenhuizen, M.; van der Lee, M. K.; Mennes, W. C.; Jeurissen, S. M.; van Leeuwen, S. P., Dioxins, PCBs and heavy metals in Chinese mitten crabs from Dutch rivers and lakes. *Chemosphere* **2015**, *123*, 1-8.
2. Kong, C.; Wang, Y.; Huang, Y.; Yu, H., Multiclass screening of >200 pharmaceutical and other residues in aquatic foods by ultrahigh-performance liquid chromatography-quadrupole-Orbitrap mass spectrometry. *Anal Bioanal Chem* **2018**, *410* (22), 5545-5553.
3. Aguilar, A.; Borrell, A., DDT and PCB reduction in the western Mediterranean from 1987 to 2002, as shown by levels in striped dolphins (*Stenella coeruleoalba*). *Mar Environ Res* **2005**, *59* (4), 391-404.
4. Chen, J.; Chen, L.; Liu, D.; Zhang, G., Organochlorine pesticide contamination in marine organisms of Yantai coast, northern Yellow Sea of China. *Environ Monit Assess* **2014**, *186* (3), 1561-8.
5. Commendatore, M.; Yorio, P.; Scenna, L.; Ondarza, P. M.; Suarez, N.; Marinao, C.; Miglioranza, K.S.B., Persistent organic pollutants in sediments, intertidal crabs, and the threatened Olrog's gull in a northern Patagonia salt marsh, Argentina. *Mar Pollut Bull* **2018**, *136*, 533-546.
6. Ben Salem, F.; Ben Said, O.; Duran, R.; Monperrus, M., Validation of an Adapted QuEChERS Method for the Simultaneous Analysis of Polycyclic Aromatic Hydrocarbons, Polychlorinated Biphenyls and Organochlorine Pesticides in Sediment by Gas Chromatography–Mass Spectrometry. *Bulletin of Environmental Contamination and Toxicology* **2016**, *96* (5), 678-684.
7. Ghaeni, M.; Pour, N.A.; Hosseini, M., Bioaccumulation of polychlorinated biphenyl (PCB), polycyclic aromatic hydrocarbon (PAH), mercury, methyl mercury, and arsenic in blue crab *Portunus segnis* from Persian Gulf. *Environmental Monitoring & Assessment* **2015**, *187* (5), 253.
8. Chamkasem, N.; Lee, S.; Harmon, T., Analysis of 19 PCB congeners in catfish tissue using a modified QuEChERS method with GC-MS/MS. *Food Chem* **2016**, *192*, 900-6.
9. Han, Y.; Liu, W.; Zhu, W.; Rao, K.; Xiao, K.; Gao, L.; Su, G.; Liu, G., Sources of polychlorinated dibenzo-p-dioxins and dibenzofurans, and biphenyls in Chinese mitten crabs. *Chemosphere* **2018**, *196*, 522-530.
